# Supplementary material
Source: Springer Nature journal article supplement (https://www.springermedizin.de/resource/supplementary/12992_2011_148_MOESM3_ESM.pdf/9616648)

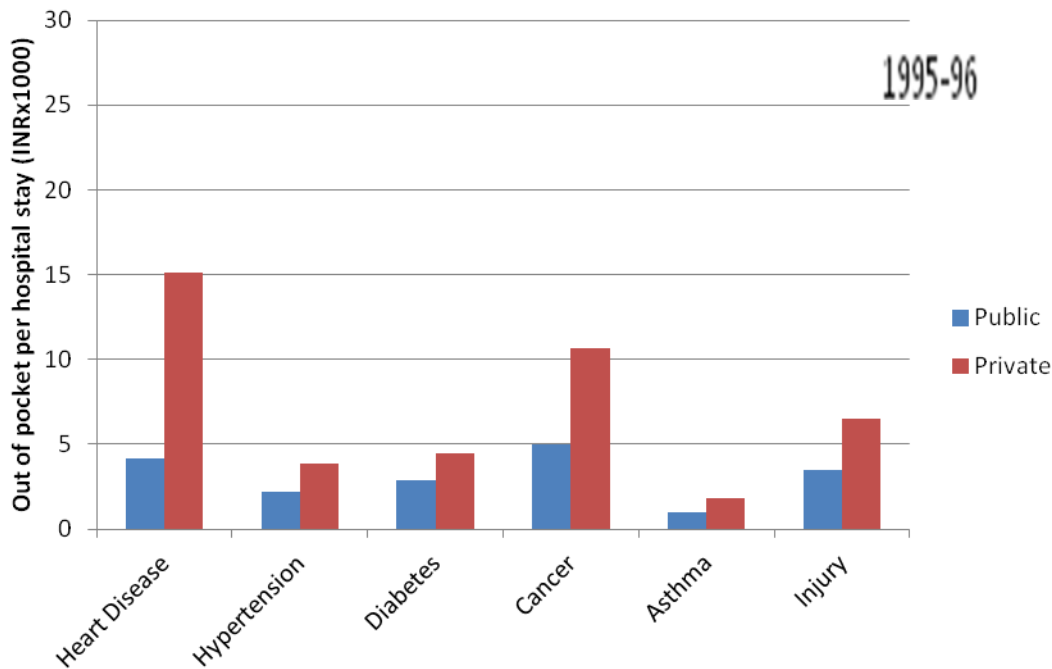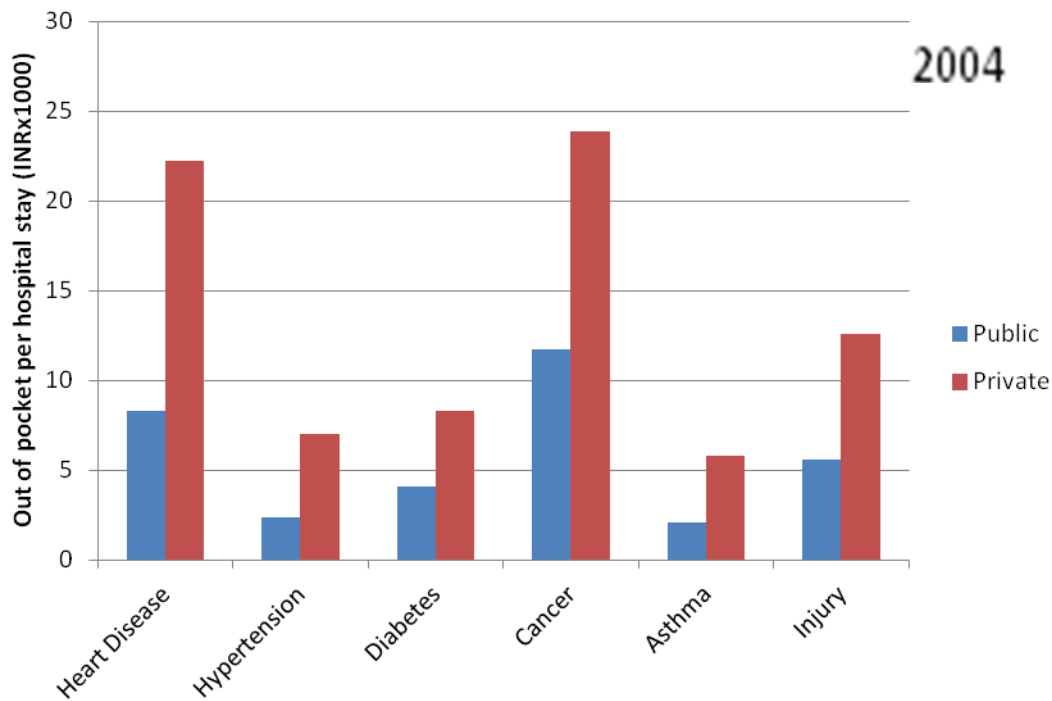

Supplement: MOESM3 [file 9616648]
